# Supplementary material for: Iron affects Ire1 clustering propensity and the amplitude of endoplasmic reticulum stress signaling
Source: PubMed Central journal article supplement (PMC5665437; doi:10.1242/jcs.201715), 2017-10-01
Supplement: joces-130-201715-s1.pdf [file joces-130-201715-s1.pdf]

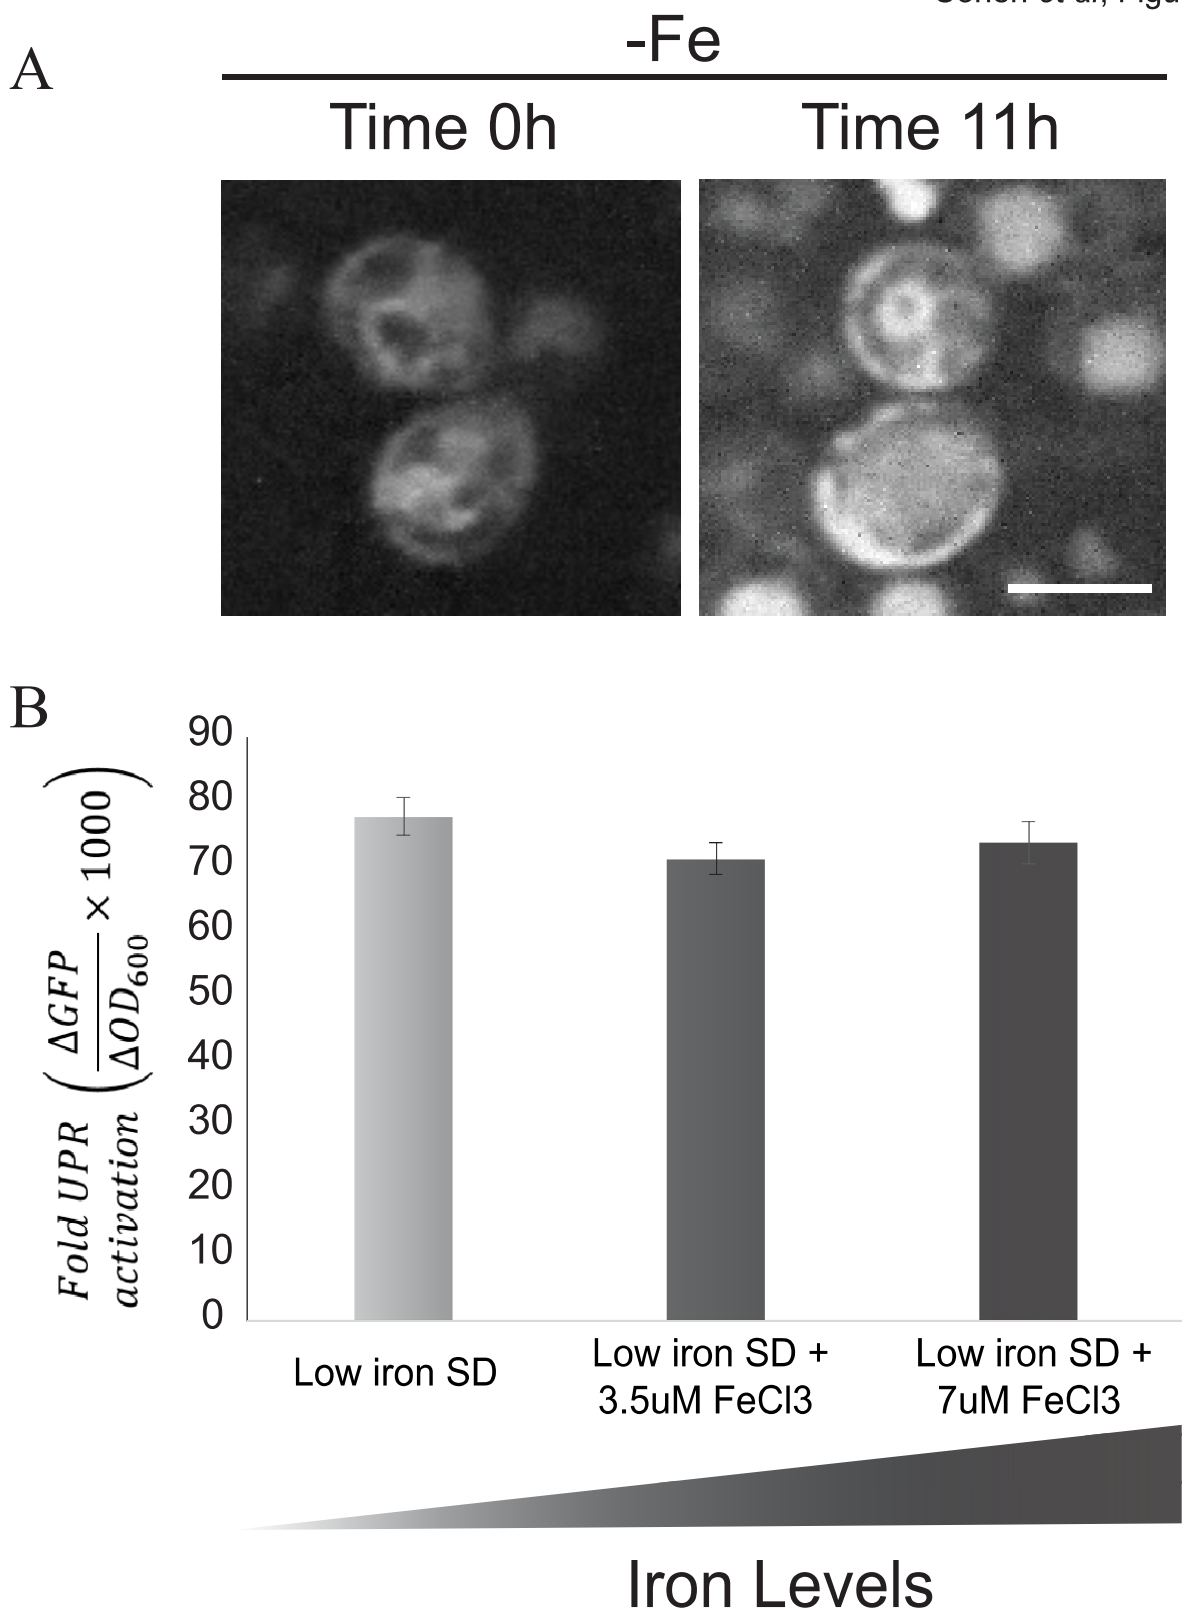

**Supplementary Figure 1: Iron does not activate the UPR on its own.**

- A) Ire1-mCherry visualization during iron depletion shows no change
- B) Ire1-mCherry clustering is not affected by the amount of iron in the medium without UPR induction.

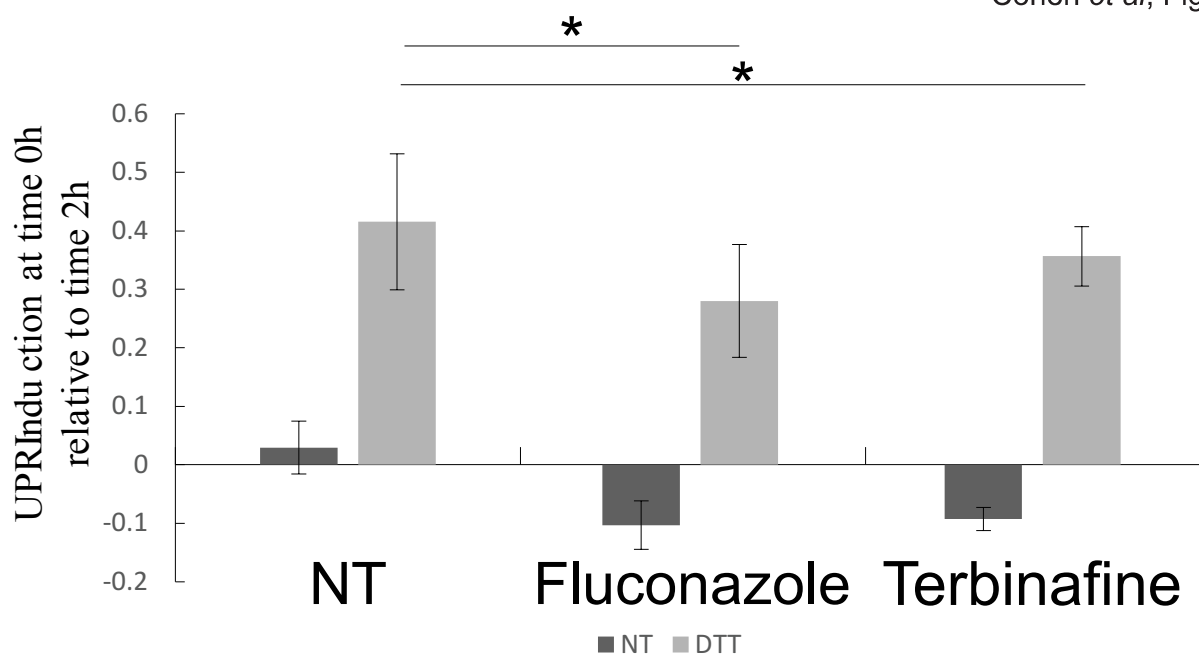

**Supplementary Figure 2: Ergosterol inhibitors reduce UPR activation.**

The ergosterol inhibitors, fluconazole and terbinafine, reduce the effective UPR response as can be seen by measuring a UPR-GFP reporter normalized to cytosolic mCherry over time at unstressed conditions and following ER stress (2mM DTT).

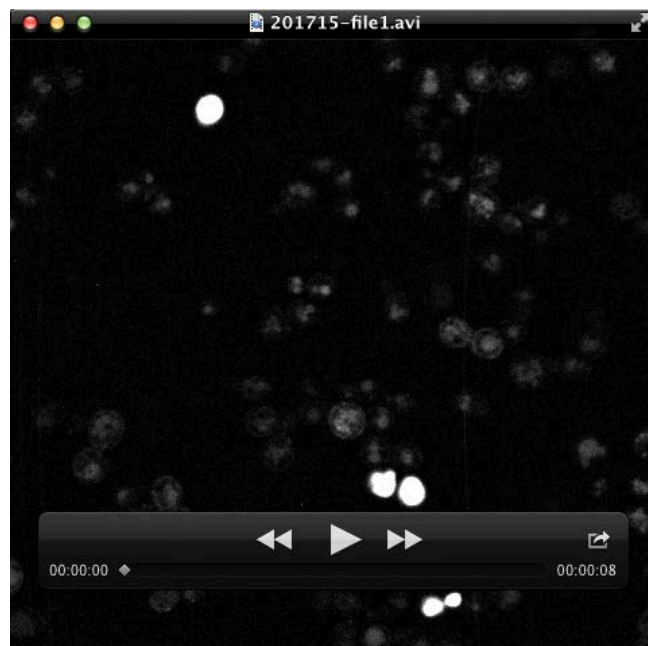

**Supplementary Movie 1: Time lapse of Ire1-mCherry clustering following 2mM DTT treatment over 14 hours.**

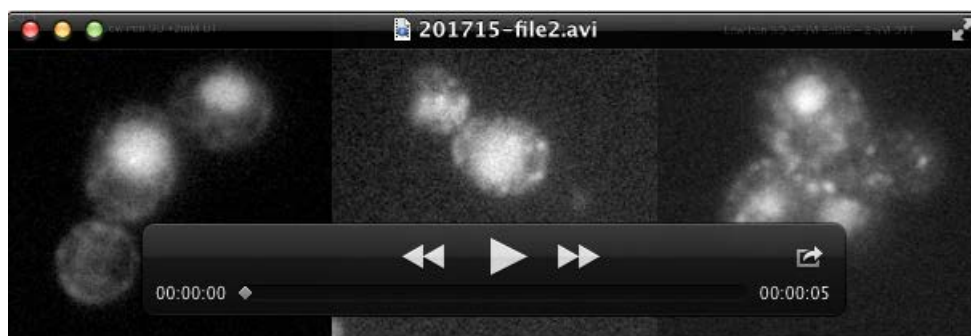

**Supplementary Movie 2: Time lapse of Ire1-mCherry clustering following 2mM DTT treatment over two hours in iron repletion (Low iron SD + 7 $\mu$ m FeCl<sub>3</sub> +2mM DTT) or iron depletion conditions (Low iron SD +2mM DTT) and their control (Low iron SD + 3.5 $\mu$ m FeCl<sub>3</sub> +2mM DTT) (iron concentrations identical to regular SD).**

Table S1-S6

[Click here to Download Tables S1 - S6](#)
